# Supplementary material
Source: PubMed Central journal article supplement (PMC9957956)

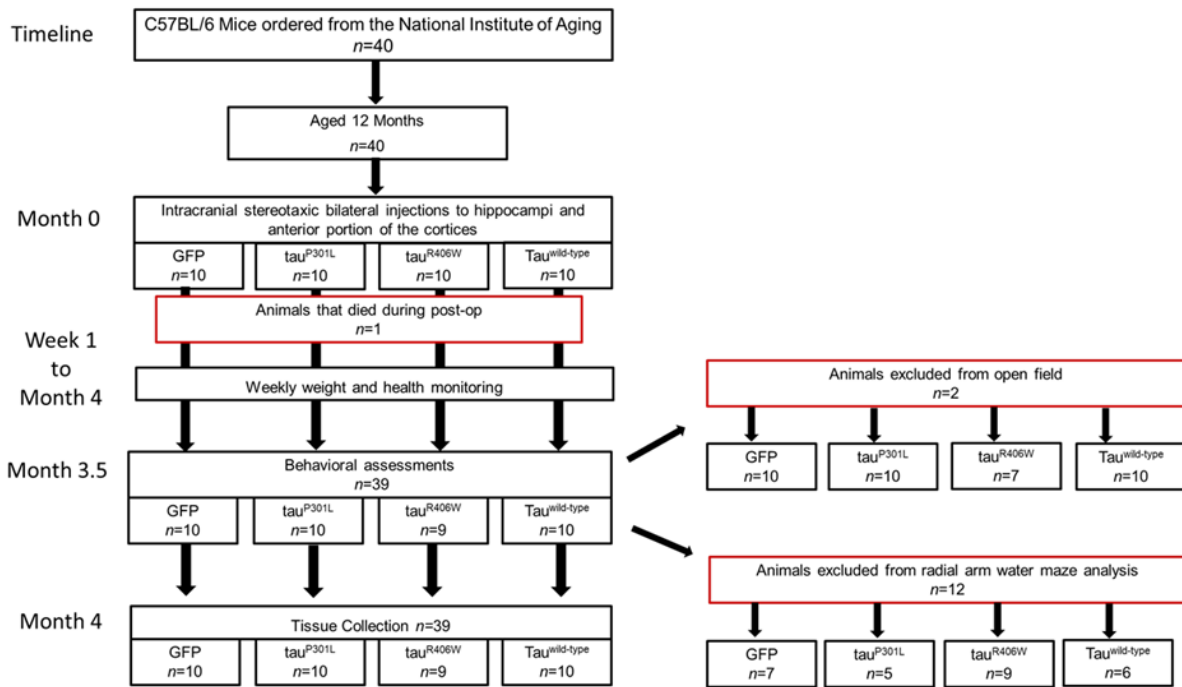

Supplement: NIHMS1859999-supplement-1.pdf [file NIHMS1859999-supplement-1.pdf]

# MHCII

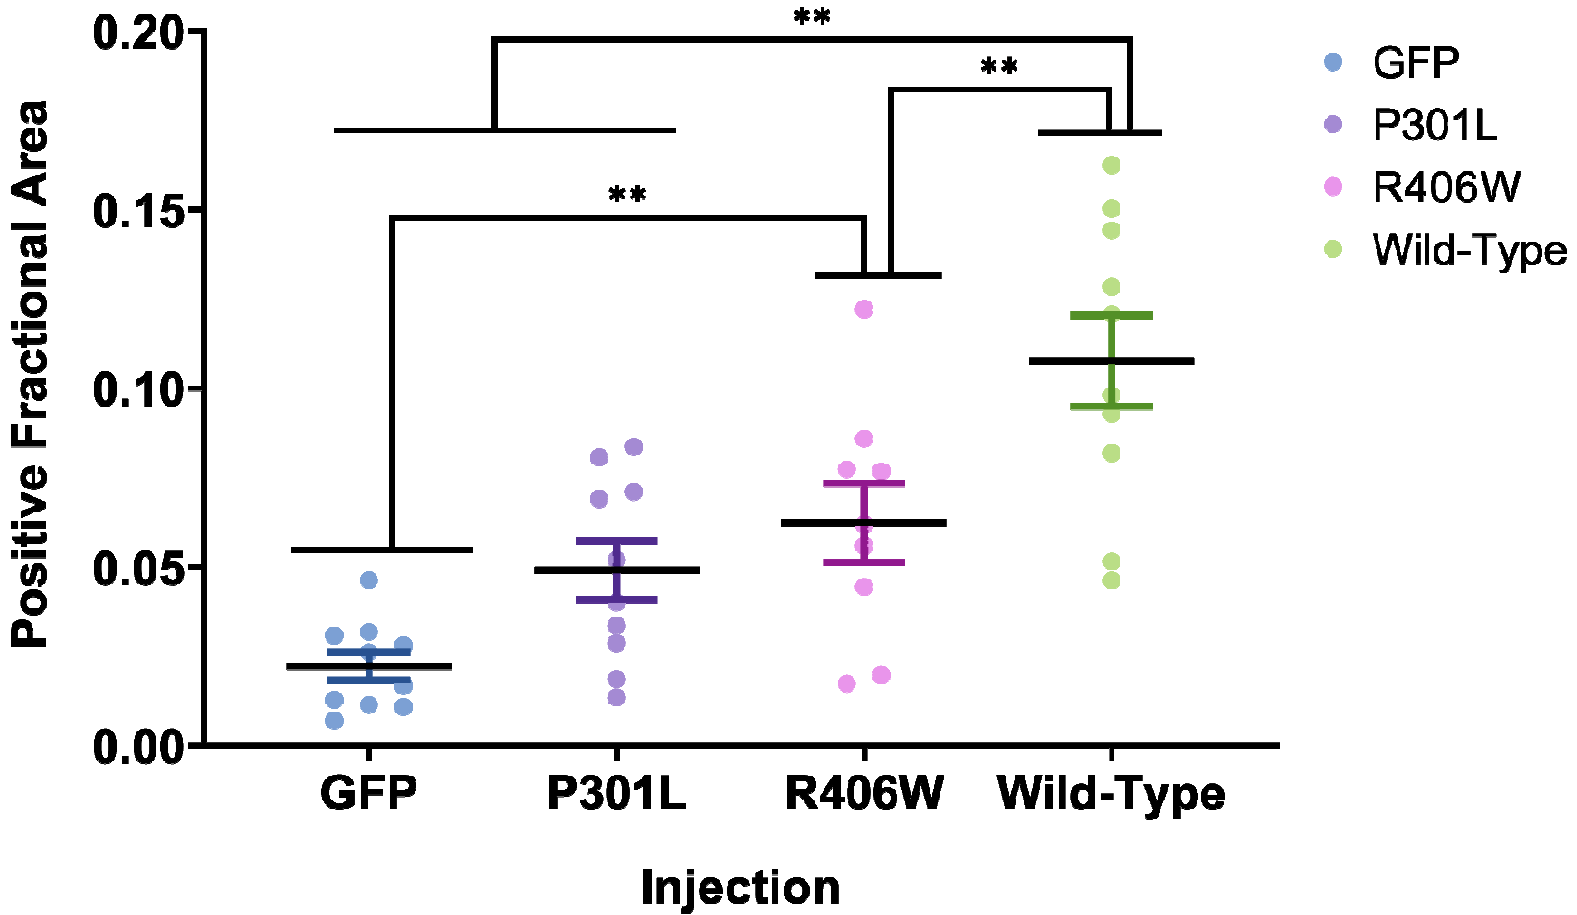

Supplement: NIHMS1859999-supplement-2.pdf [file NIHMS1859999-supplement-2.pdf]

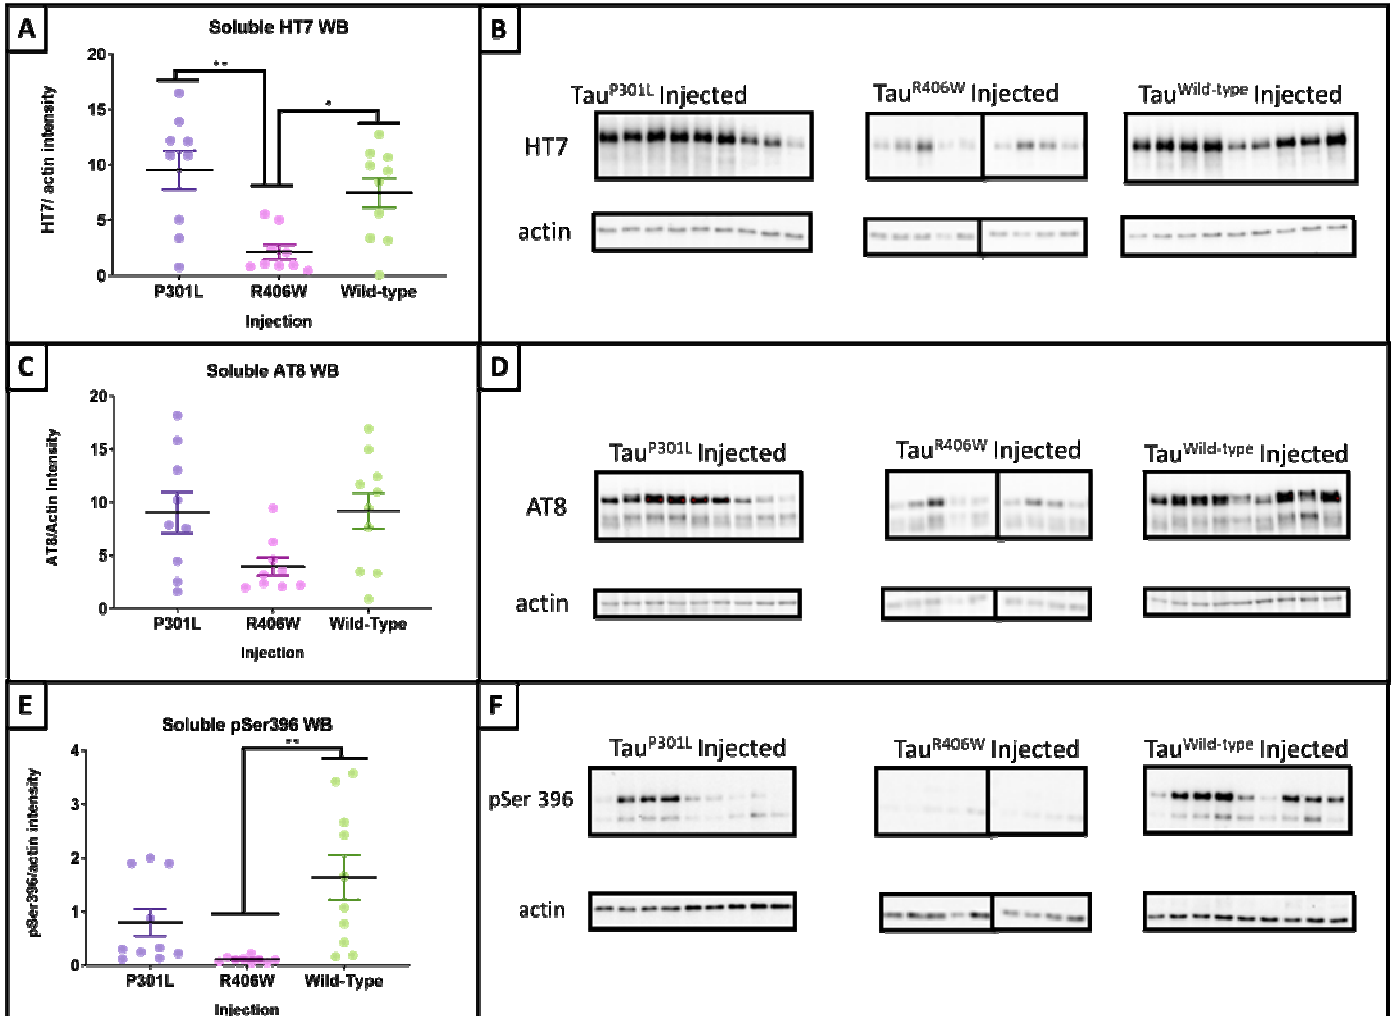

Supplement: NIHMS1859999-supplement-3.pdf [file NIHMS1859999-supplement-3.pdf]
